# Supplementary material for: Quinone-based conjugated polymer cathodes synthesized via direct arylation for high performance Li-organic batteries
Source: Royal Society of Chemistry journal article supplement (doi:10.1039/d2cc01092e), 2022-01-01
Supplement: d2cc01092e1.pdf [file d2cc01092e1.pdf]

## ***Supporting Information for***

# **Quinone-Based Conjugated Polymer Cathodes Synthesized via Direct Arylation for High Performance Li-Organic Batteries**

Peiyun Zheng, Changzhi Han, Lian-Wei Luo, Peihua Dong, Wenyan Ma, Chong Zhang\*, Yu Chen\*, and Jia-Xing Jiang\*

Key Laboratory for Macromolecular Science of Shaanxi Province, Shaanxi Key Laboratory for Advanced Energy Devices, School of Materials Science and Engineering, Shaanxi Normal University, Xi'an 710062, P. R. China.

E-mail: chongzhangabc@snnu.edu.cn; ndchenyu@gmail.com; jiaxing@snnu.edu.cn

## **Experiment section**

### ***Materials:***

Anhydrous potassium carbonate ( $K_2CO_3$ ), anhydrous 1,2-dimethylbenzene (ODMB), pivalic acid (PivOH), tris(dibenzylideneacetone)dipalladium ( $Pd_2(dba)_3$ ), tris(2-methoxyphenyl)phosphine ( $P(o-MeOPh)_3$ ), benzo[1,2-b:4,5-b']dithiophene-4,8-dione (BDTD), 1,4-dibromobenzene, 1,2,4,5-tetrabromobenzene, 1.0 M LiTFSI in dimethoxyethane (DME) and dioxolane (DOL) (1:1, v/v), aluminum foil, Ketjen black and sodium alginate were purchased from Acros, Alfa, TCI, and Aldrich, and they are used directly without purification.

***Synthesis of conjugated polymer PBDTD-1:*** Under a nitrogen atmosphere, BDTD (110.14 mg, 0.5 mmol), 1,4-dibromobenzene (117.95 mg, 0.5 mmol), anhydrous  $K_2CO_3$  (180 mg, 1.30 mmol), PivOH (30.64 mg, 0.3 mmol),  $Pd_2(dba)_3$  (13.7 mg, 0.0015 mmol),  $P(o-MeOPh)_3$  (10.6 mg, 0.03 mmol) and anhydrous o-xylene (5 mL) were added into a 100 mL two-necked flask. The reaction system was heated to 100 °C for 72 h, and then cooled to room temperature. After filtration, the obtained precipitate was washed three times with methanol, and water. Finally, the polymer was dried at 80 °C under vacuum for 24 h to obtain a deep-red powder. The average number molecular weight is 34,454 g/mol. The yield was 85.56%. Anal. Calcd. for  $(C_{16}H_6O_2S_2)_n$  (%): C 65.29; H 2.05; O 10.87; S 21.78. Found: C 61.14; H 2.35; O 11.72; S 19.74.

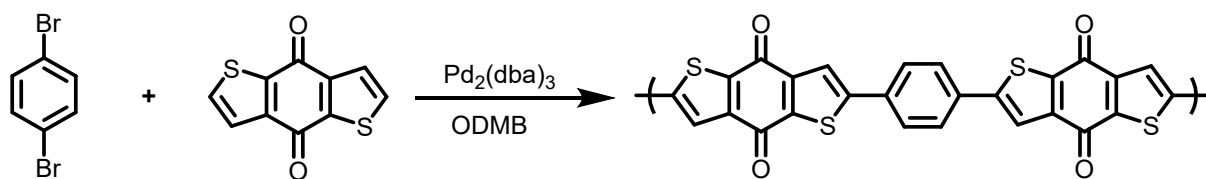

**Scheme S1.** Synthetic route of the PBDTD-1.

**Synthesis of conjugated polymer PBDTD-2:** Under a nitrogen atmosphere, BDTD (220.27 mg, 1 mmol), 1,2,4,5-tetrabromobenzene (196.85 mg, 0.5 mmol), anhydrous  $K_2CO_3$  (180 mg, 1.30 mmol), PivOH (30.64 mg, 0.3 mmol),  $Pd_2(dba)_3$  (13.7 mg, 0.0015 mmol),  $P(o-MeOPh)_3$  (10.6 mg, 0.03 mmol) and anhydrous *o*-xylene (5 mL) were added into a 100 mL two-necked flask. The reaction system was heated to 100 °C for 72 h, and then cooled to room temperature. After filtration, the obtained precipitate was washed three times with methanol, water, and dichloromethane. Finally, the polymer was dried at 80 °C under vacuum for 24 h to obtain an orange solid powder. The yield was 94.56%. Anal. Calcd. for  $(C_{26}H_6O_4S_4)_n$  (%): C 61.16; H 1.18; O 12.53; S 25.12. Found: C 56.42; H 1.73; O 13.27; S 24.08.

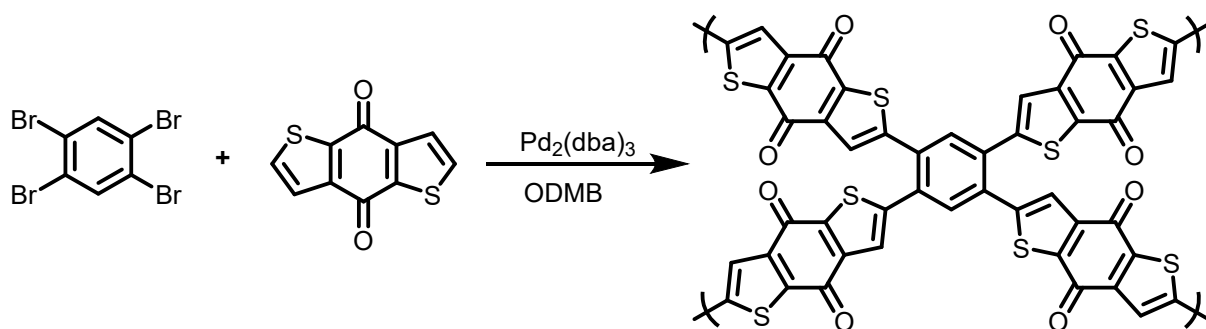

**Scheme S2.** Synthetic route of the PBDTD-2.

**Characterizations:** Infrared spectra of the polymers measured on a NICOLET 5397 AVATAR 360 FT-IR. The solid state  $^{13}C$  CP/MAS NMR spectrum was performed on the JEOL RESONANCE ECZ 400R NMR spectrometer with a MAS frequency of 12 kHz. The thermal stability of the polymers of PBDTD was performed by a thermogravimetric analysis instrument (Q1000DSC+LNCS+FACS Q600DT) with the temperature range from 20 to 800 °C under  $N_2$  condition. Powder X-ray diffraction (PXRD) measurement was carried out on X-ray diffractometer (D/Max-3c). The elemental analysis measurement was carried out on the EURO EA30000 elemental analysis instrument. The morphology of the polymer was collected on the field emission scanning electron microscope (SEM) (SU8020, Hitachi). The UV-Vis adsorption spectra were recorded on a scanning UV-Vis spectrophotometer (UV-Lambda 950, PerkinElmer, US) using  $BaSO_4$  as a reference sample. The specific surface area

and pore size distributions were obtained by an ASAP 2420-4 (micromeritics) CO<sub>2</sub> adsorption analyzed at 195.6 K. The DFT simulation of the electronic structure of the polymer was measured at the B3LYP/6-31G (d) level by using Gauss 09. The density functional theory calculation of the binding energy was carried out by the projected enhanced wave (PAW) method.

**Electrochemical performance measurements:** The polymer cathodes were prepared by mixing active material (60 wt%) with Ketjen black (30 wt%) and sodium alginate binder (10 wt%) in a mortar using distilled water as the solvent. The obtained slurry was evenly coated on the aluminum foil current collector by a doctor blade, and then dried at 50 °C for 6 h and 110 °C for 12 h, respectively. The mass loading of the active material is in the range of 0.7-1 mg/cm<sup>2</sup>. The CR2016 button cells were assembled using lithium foil as the anode, glass fiber membrane as the separator, and 1.0 M LiTFSI in dimethoxyethane (DME) / dioxolane (DOL) (1:1, v/v) as the electrolyte in a glove box with argon atmosphere (water and oxygen content < 1.0 ppm). The galvanostatic charge/discharge measurement was carried out on a NEWARE-BTS-5 V/10 mA battery tester. Cyclic voltammetry test was performed on an electrochemical workstation (CHI660E, Shanghai Chenhua).

The GITT results were calculated employing the following equation (1)<sup>1</sup>:

If the battery voltage has a linear relationship with  $\tau^{1/2}$ , the above formula can be simplified as the following formula (2):

$$D = \frac{4}{\pi\tau} \left( \frac{M_B V_M}{M_B S} \right)^2 \left( \frac{\Delta E S}{\tau \left( \frac{dE\tau}{D\sqrt{\tau}} \right)} \right)^2 (\pi \ll L^2 / D) \quad (1)$$

$$D = \frac{4}{\pi\tau} \left( \frac{V_m m_B}{S M B} \right)^2 \left( \frac{\Delta E S}{\Delta E \tau} \right)^2 \quad (2)$$

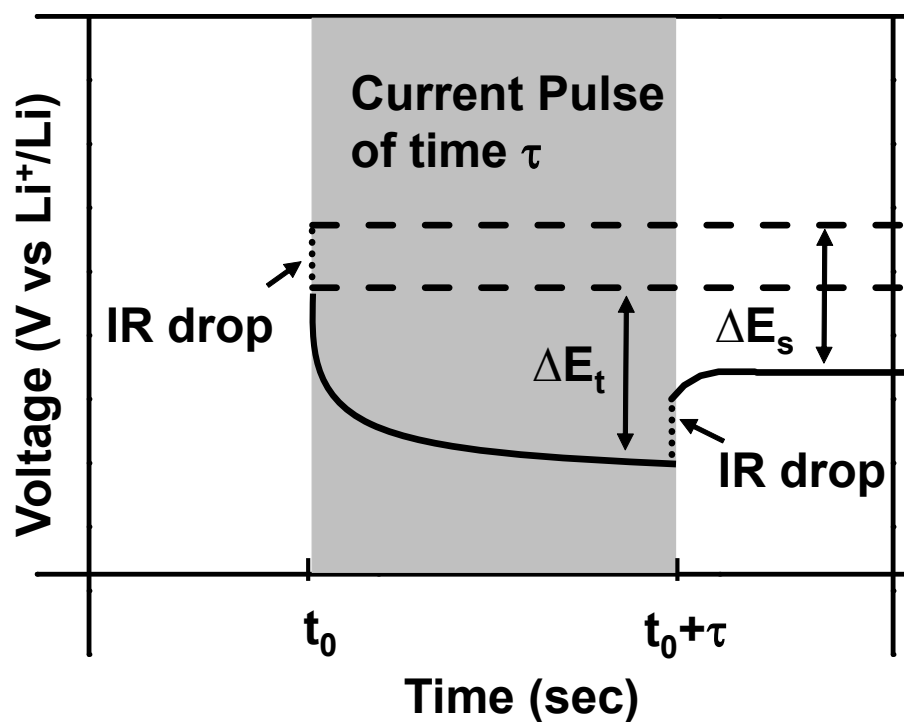

Where  $\tau$  is the current pulse time (s),  $V_m$  is the molar volume of the polymer ( $\text{cm}^3 \text{mol}^{-1}$ ),  $m_B$  is the mass of the polymer in the electrode (g),  $M_B$  is the molar mass of the polymer ( $\text{g/mol}$ ),  $S$  is the contact surface area ( $\text{cm}^2$ ) between the electrode and the electrolyte.

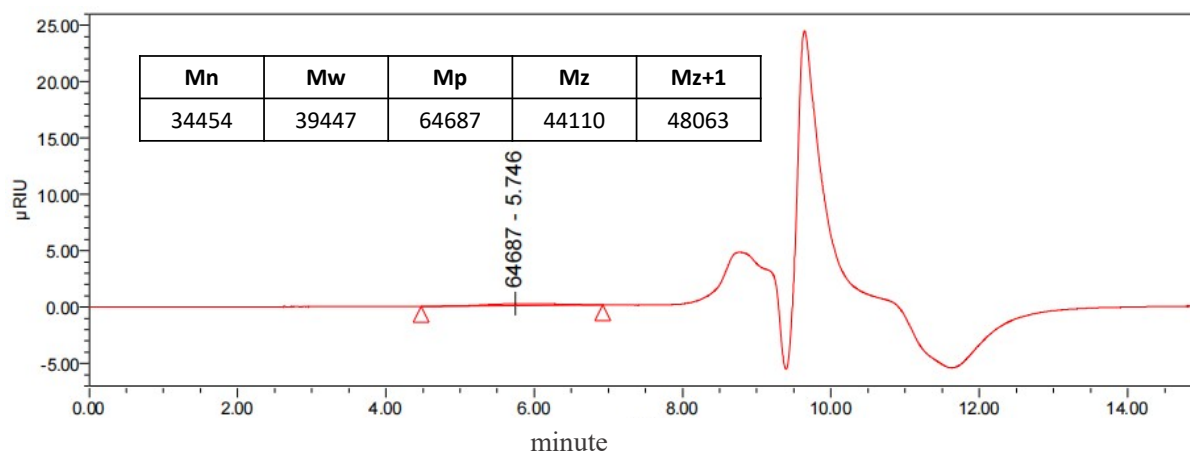

**Fig. S1.** The gel permeation chromatogram of PBDTD-1 for molecular weight.

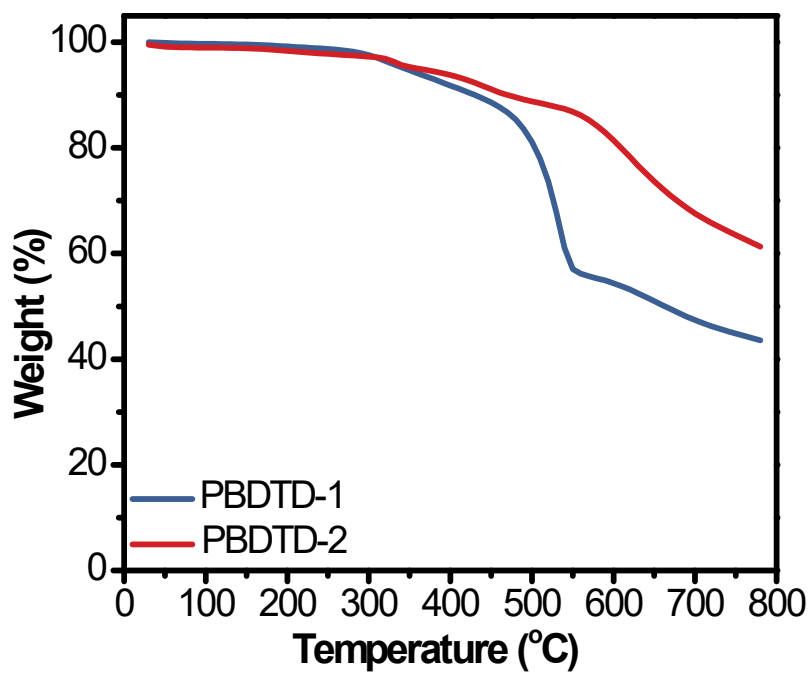

Fig. S2. The TGA curves of PBDTD-1 and PBDTD-2 under nitrogen atmosphere.

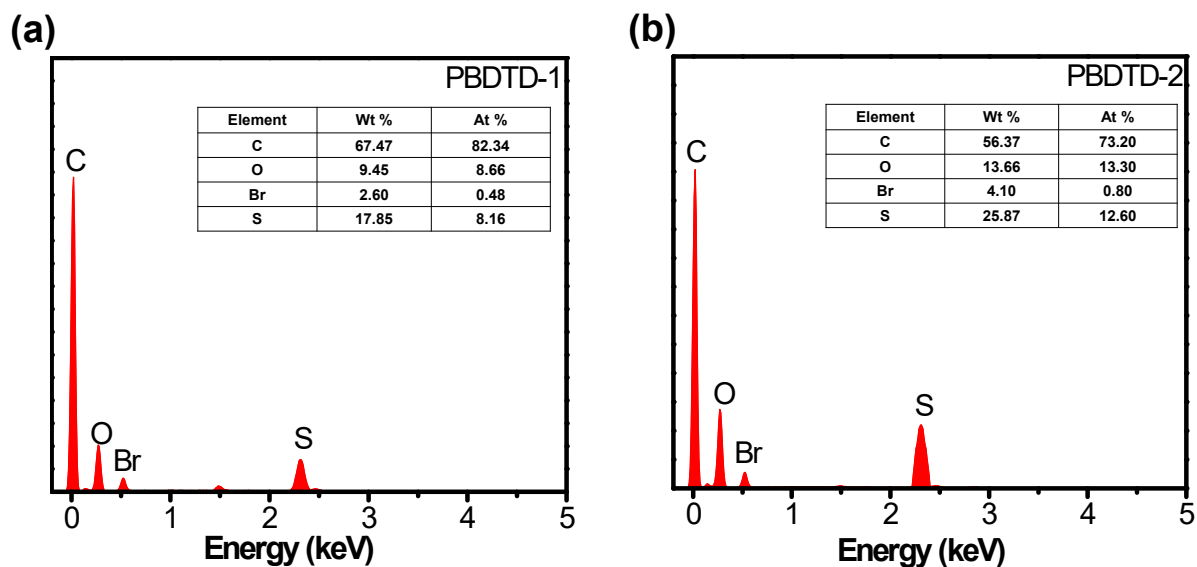

Fig. S3. The EDX spectra of the two polymers. (a) PBDTD-1, (b) PBDTD-2.

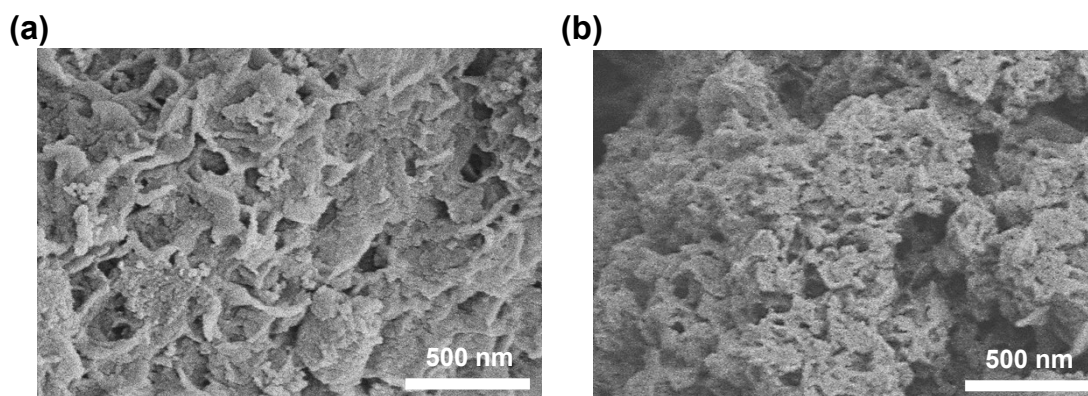

**Fig. S4.** SEM images of (a) PBDTD-1 and (b) PBDTD-2.

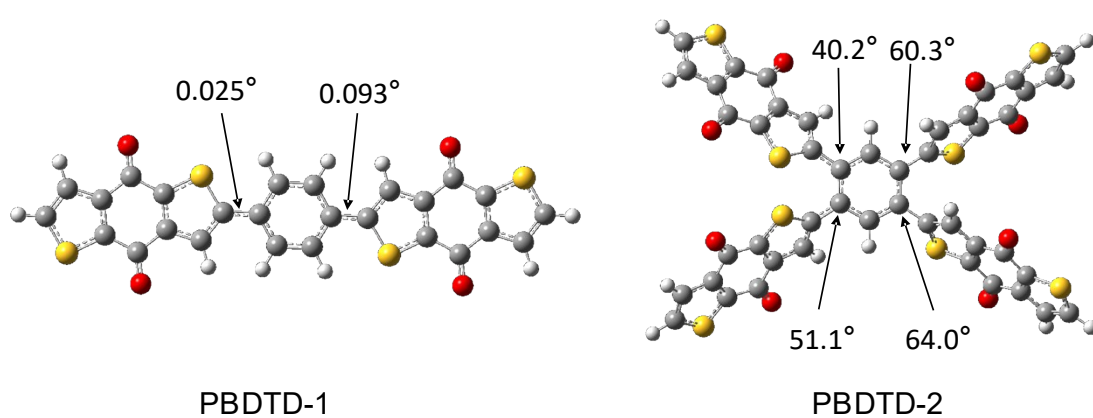

**Fig. S5.** DFT geometry optimizations and the dihedral angles of the simplified polymer fragments of the polymers.

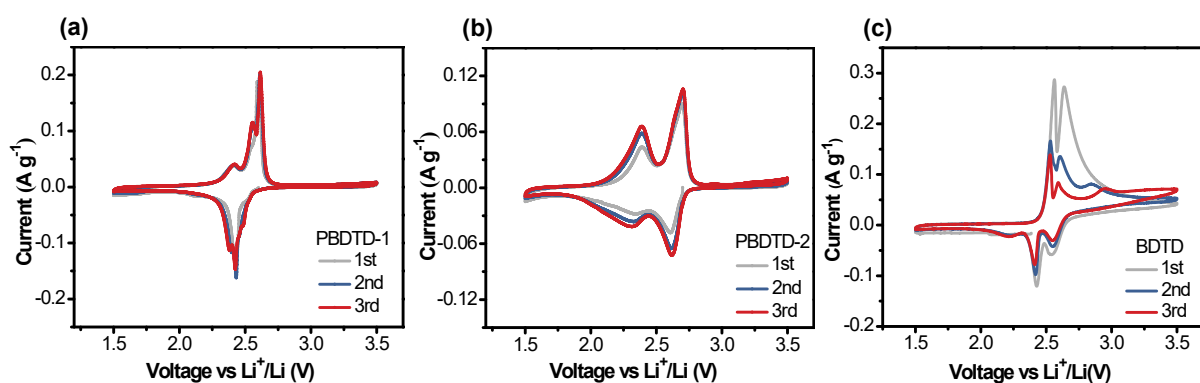

**Fig. S6.** The CV curves of (a) PBDTD-1, (b) PBDTD-2 and (c) BDTD at  $0.1 \text{ mV s}^{-1}$ .

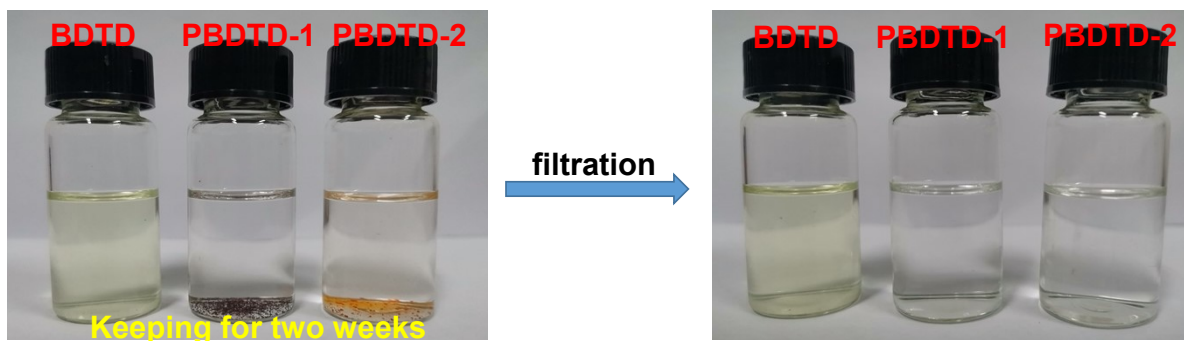

**Fig. S7.** The photographs of the BDTD and the two polymers in the electrolytes and the corresponding filtrates.

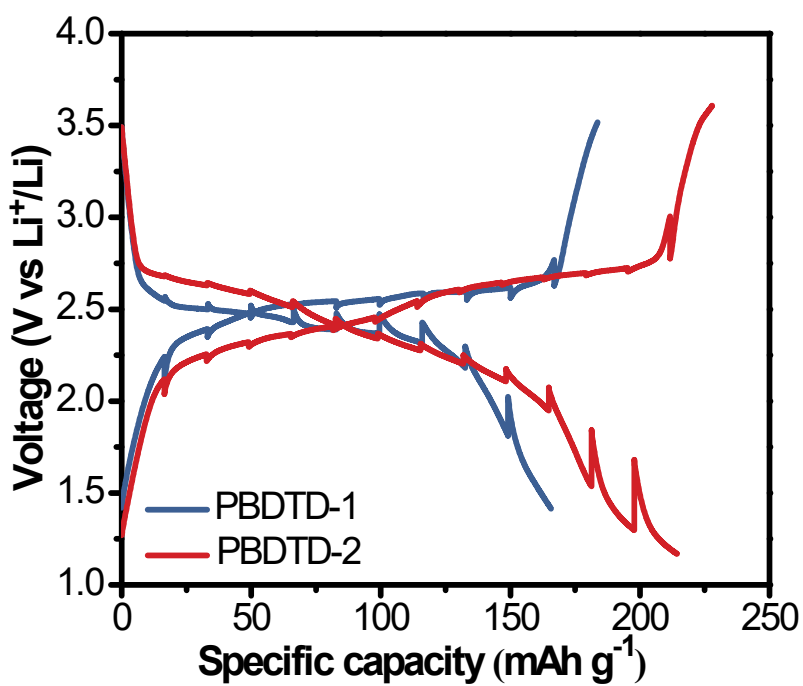

**Fig. S8.** The GITT response for PBDTD-1 and PBDTD-2.

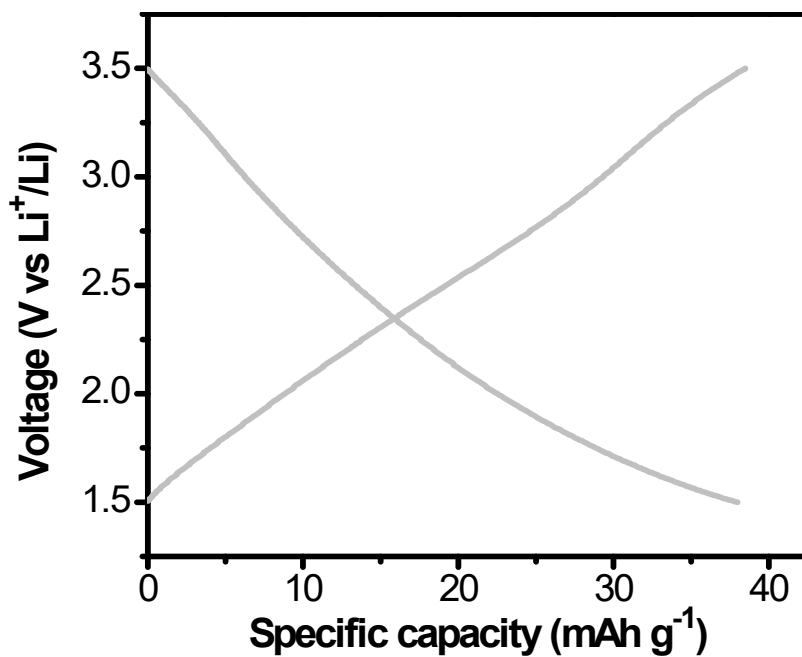

Fig. S9. The GCD curves of Ketjen black.

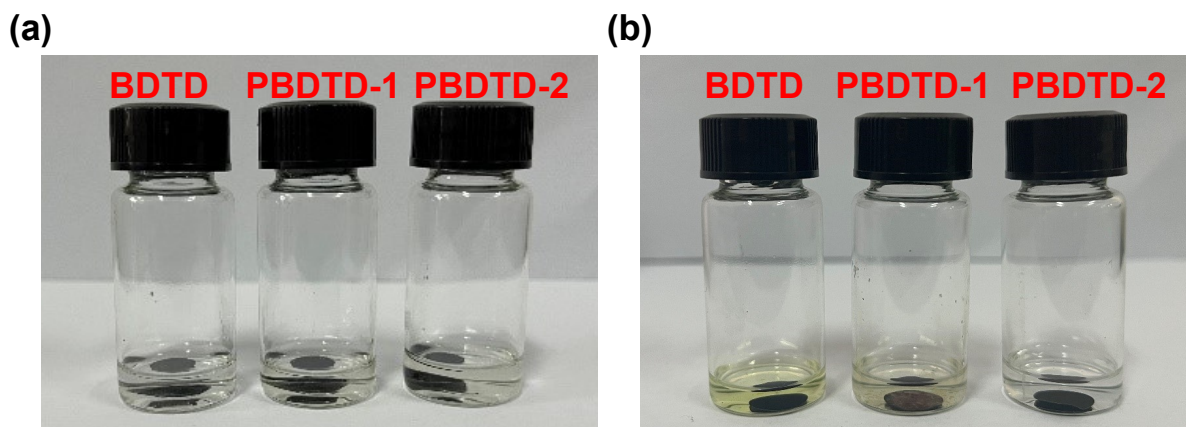

Fig. S10. Photographs of the electrodes immersed in the electrolytes at the pristine (a) and discharged (b) states, respectively.



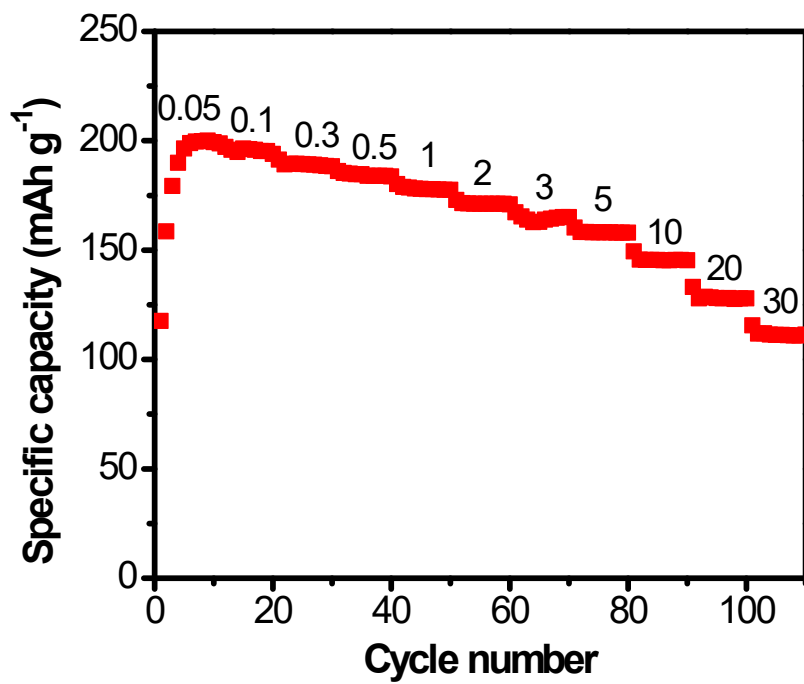

Fig. S11. The rate performance of PBDTD-2.

**Table S1.** The comparison of electrochemical performances of PBDTD-2 with previously reported organic carbonyl cathodes in alkali metal-ion batteries.

| Sample                 | Specific capacity<br>(mAh g <sup>-1</sup> )<br>(current) | Rate capacity<br>(mAh g <sup>-1</sup> )<br>(current) | Cycle number<br>(current)        | Refs             |
|------------------------|----------------------------------------------------------|------------------------------------------------------|----------------------------------|------------------|
| <b>PBDTD-2</b>         | <b>200 (0.05 A g<sup>-1</sup>)</b>                       | <b>111 (30 A g<sup>-1</sup>)</b>                     | <b>3000 (5 A g<sup>-1</sup>)</b> | <b>This work</b> |
| PBDAPA                 | 132.7 (0.02 A g <sup>-1</sup> )                          | 97.1 (0.2 A g <sup>-1</sup> )                        | 100 (0.02 A g <sup>-1</sup> )    | 2                |
| Li2PDHBQS              | 247 (0.05 A g <sup>-1</sup> )                            | 123.5 (10 A g <sup>-1</sup> )                        | 1500 (0.5 A g <sup>-1</sup> )    | 3                |
| PBDTD                  | 214.2 (0.25 A g <sup>-1</sup> )                          | 125 (12.5 A g <sup>-1</sup> )                        | 250 (1.25 A g <sup>-1</sup> )    | 4                |
| PDPA-AQ                | 159 (0.02 A g <sup>-1</sup> )                            | 50 (0.4 A g <sup>-1</sup> )                          | 100 (0.02 A g <sup>-1</sup> )    | 5                |
| PAQS                   | 185 (0.05 A g <sup>-1</sup> )                            | 151 (0.5 A g <sup>-1</sup> )                         | -                                | 6                |
| PT-CMPs                | 166.7 (0.05 A g <sup>-1</sup> )                          | 93.1 (1 A g <sup>-1</sup> )                          | 100 (0.05 A g <sup>-1</sup> )    | 7                |
| P15AQs                 | 250 (0.02 A g <sup>-1</sup> )                            | 125 (1 A g <sup>-1</sup> )                           | 200 (0.02 A g <sup>-1</sup> )    | 8                |
| Na <sub>2</sub> AQ26DS | 138 (0.05 A g <sup>-1</sup> )                            | 40 (2 A g <sup>-1</sup> )                            | 900 (0.05 A g <sup>-1</sup> )    | 9                |
| PMAQ-SWNT              | 190 (0.04A g <sup>-1</sup> )                             | 120 (8 A g <sup>-1</sup> )                           | 300 (0.2 A g <sup>-1</sup> )     | 10               |
| PyAq                   | 169 (0.02 A g <sup>-1</sup> )                            | 142 (1 A g <sup>-1</sup> )                           | 4000 (1 A g <sup>-1</sup> )      | 11               |
| DTT                    | 292 (0.03 A g <sup>-1</sup> )                            | 220 (0.3 A g <sup>-1</sup> )                         | 200 (0.03 A g <sup>-1</sup> )    | 12               |
| PI10G                  | 232.6 (0.02 A g <sup>-1</sup> )                          | 159.8 (1 A g <sup>-1</sup> )                         | 1000 (10 A g <sup>-1</sup> )     | 13               |
| BAQB                   | 212 (0.04 A g <sup>-1</sup> )                            | 138 (2 A g <sup>-1</sup> )                           | 100 (0.04 A g <sup>-1</sup> )    | 14               |
| NTAQ                   | 130.8 (0.05 A g <sup>-1</sup> )                          | 62.4 (1.5 A g <sup>-1</sup> )                        | 1000 (0.15 A g <sup>-1</sup> )   | 15               |
| TAPT-<br>NTCDA@CNT     | 155.5 (0.05 A g <sup>-1</sup> )                          | 89.7 (2 A g <sup>-1</sup> )                          | 500 (1 A g <sup>-1</sup> )       | 16               |
| PPTC                   | 146.3 (0.05 A g <sup>-1</sup> )                          | 87.2 (0.5 A g <sup>-1</sup> )                        | 300 (0.5 A g <sup>-1</sup> )     | 17               |
| PI-4                   | 86.2 (0.025 A g <sup>-1</sup> )                          | 42.1 (1 A g <sup>-1</sup> )                          | 10000 (0.5 A g <sup>-1</sup> )   | 18               |
| PAQS/CNT-2             | 184(0.02 A g <sup>-1</sup> )                             | 79.1 (0.4 A g <sup>-1</sup> )                        | 200 (0.04 A g <sup>-1</sup> )    | 19               |
| PI50                   | 165 (0.5 A g <sup>-1</sup> )                             | 125 (2 A g <sup>-1</sup> )                           | 9000 (2 A g <sup>-1</sup> )      | 20               |

|                               |                                  |                                |                                                             |    |
|-------------------------------|----------------------------------|--------------------------------|-------------------------------------------------------------|----|
| C <sub>6</sub> O <sub>6</sub> | 902 (0.02 A g <sup>-1</sup> )    | 382 (0.5 A g <sup>-1</sup> )   | 100 (0.05 A g <sup>-1</sup> )                               | 21 |
| AQ-COF@CNTs                   | 144 (0.05 A g <sup>-1</sup> )    | 69 (10 A g <sup>-1</sup> )     | 3000 (0.25 A g <sup>-1</sup> )                              | 22 |
| PQ                            | 197 (0.05 A g <sup>-1</sup> )    | 85 (5 A g <sup>-1</sup> )      | 500 (0.05 A g <sup>-1</sup> )                               | 23 |
| IEP-11-S5R5@S10               | 83.7 (0.004 A g <sup>-1</sup> )  | 13.3 (1.5 A g <sup>-1</sup> )  | 1000 (0.15 A g <sup>-1</sup> )                              | 24 |
| PTCDI-DAQ                     | 229 (0.1 A g <sup>-1</sup> )     | 46 (25 A g <sup>-1</sup> )     | 20000 (3 A g <sup>-1</sup> )                                | 25 |
| DAPQ-COF50                    | 162 (0.5 A g <sup>-1</sup> )     | 94 (50 A g <sup>-1</sup> )     | 3000 (2 A g <sup>-1</sup> )                                 | 26 |
| DTN                           | 285.8 (0.05 A g <sup>-1</sup> )  | 153.6 (4 A g <sup>-1</sup> )   | 1000 (1.5 A g <sup>-1</sup> )                               | 27 |
| BA-PI                         | 85 (0.025 A g <sup>-1</sup> )    | 9 (0.2 A g <sup>-1</sup> )     | -                                                           | 28 |
| NP2                           | 245 (0.05 A g <sup>-1</sup> )    | 188 (0.5 A g <sup>-1</sup> )   | 200 (0.5 A g <sup>-1</sup> )                                | 29 |
| IEP-11-E12                    | 100 (0.15 A g <sup>-1</sup> )    | 47 (4.5 A g <sup>-1</sup> )    | 80000 (4.5 A g <sup>-1</sup> )                              | 30 |
| NDI-BQ                        | 168 (0.04 A g <sup>-1</sup> )    | -                              | 200 (0.04 A g <sup>-1</sup> )                               | 31 |
| NC@AQ                         | 202.1 (0.025 A g <sup>-1</sup> ) | 152.9 (0.5 A g <sup>-1</sup> ) | 1000 (0.05 A g <sup>-1</sup> ,<br>0.125 A g <sup>-1</sup> ) | 32 |
| P500                          | 165 (0.02 A g <sup>-1</sup> )    | -                              | 100 (0.02 A g <sup>-1</sup> )                               | 33 |
| PAQS2                         | 177 (0.025 A g <sup>-1</sup> )   | 41 (0.8 A g <sup>-1</sup> )    | 1000 (0.5 A g <sup>-1</sup> , 1 A g <sup>-1</sup> )         | 34 |
| PAQnS                         | 356 (0.1 A g <sup>-1</sup> )     | 180 (2 A g <sup>-1</sup> )     | 125 (0.05 A g <sup>-1</sup> )                               | 35 |
| PFNDI                         | 24.6 (0.05 A g <sup>-1</sup> )   | 6.5 (2.5 A g <sup>-1</sup> )   | 500 (0.5 A g <sup>-1</sup> )                                | 36 |
| P14AQ/CNT                     | 220 (0.05 A g <sup>-1</sup> )    | 25 (1.25 A g <sup>-1</sup> )   | 100 (0.05 A g <sup>-1</sup> )                               | 37 |
| PAQS                          | 220(0.05 A g <sup>-1</sup> )     | 125 (1.25 A g <sup>-1</sup> )  | 1000 (1 A g <sup>-1</sup> )                                 | 38 |
| DMAQ                          | 168 (0.08 A g <sup>-1</sup> )    | 75 (2 A g <sup>-1</sup> )      | 80 (0.04 A g <sup>-1</sup> )                                | 39 |
| BQbTPL                        | 152.9 (0.1 A g <sup>-1</sup> )   | 97.3 (1 A g <sup>-1</sup> )    | 1500 (1 A g <sup>-1</sup> )                                 | 40 |
| BBQB                          | 367 (0.04 A g <sup>-1</sup> )    | 171 (1.2 A g <sup>-1</sup> )   | 100 (0.04 A g <sup>-1</sup> )                               | 41 |
| PAQS@3D-C                     | 219 (0.05 A g <sup>-1</sup> )    | 173 (2.5 A g <sup>-1</sup> )   | 500 (0.05 A g <sup>-1</sup> )                               | 42 |

|                     |                                 |                                |                                |    |
|---------------------|---------------------------------|--------------------------------|--------------------------------|----|
| PPh-PTO             | 235 (0.1 A g <sup>-1</sup> )    | 94 (2 A g <sup>-1</sup> )      | 1400 (0.1 A g <sup>-1</sup> )  | 43 |
| LiDHAQS             | 350 (0.1 A g <sup>-1</sup> )    | 236 (4 A g <sup>-1</sup> )     | 1200 (0.8 A g <sup>-1</sup> )  | 44 |
| 2D-PDI@CNT          | 104 (0.2 A g <sup>-1</sup> )    | 95 (2 A g <sup>-1</sup> )      | 8000 (0.5 A g <sup>-1</sup> )  | 45 |
| PPTODB              | 185 (0.02 A g <sup>-1</sup> )   | 98 (1.5 A g <sup>-1</sup> )    | 150 (0.02 A g <sup>-1</sup> )  | 46 |
| PT-2NO <sub>2</sub> | 301.3 (0.05 A g <sup>-1</sup> ) | 103.7 (1 A g <sup>-1</sup> )   | 500 (0.5 A g <sup>-1</sup> )   | 47 |
| COF-TRO             | 268 (0.03 A g <sup>-1</sup> )   | 98 (0.6 A g <sup>-1</sup> )    | 100 (0.03 A g <sup>-1</sup> )  | 48 |
| PIBN-G              | 271 (0.03 A g <sup>-1</sup> )   | 206.7 (1.5 A g <sup>-1</sup> ) | 300 (1.5 A g <sup>-1</sup> )   | 49 |
| PAQS                | 129 (0.05 A g <sup>-1</sup> )   | 107 (1 A g <sup>-1</sup> )     | 200 (0.05 A g <sup>-1</sup> )  | 50 |
| DAAQ-TFP COF        | ~60 (0.1 A g <sup>-1</sup> )    | ~30 (4 A g <sup>-1</sup> )     | 500 (0.2 A g <sup>-1</sup> )   | 51 |
| PI-ECOF-1/rGO50     | 167 (0.014 A g <sup>-1</sup> )  | 90 (1.42 A g <sup>-1</sup> )   | 300 (0.014 A g <sup>-1</sup> ) | 52 |
| PI@GS-2             | 165 (0.02 A g <sup>-1</sup> )   | 125 (4 A g <sup>-1</sup> )     | 5000 (1 A g <sup>-1</sup> )    | 53 |
| PEPTO               | 249 (0.02 A g <sup>-1</sup> )   | 98 (1.5 A g <sup>-1</sup> )    | 1000 (0.8 A g <sup>-1</sup> )  | 54 |
| PBDTDS              | 196 (0.2 A g <sup>-1</sup> )    | -                              | 4200 (2 A g <sup>-1</sup> )    | 55 |

---

### Supplementary References

1. Y. Ding, Y. Li and G. Yu, *Chem*, 2016, **1**, 790-801.
2. C. Su, B. Han, J. Ma and L. Xu, *ChemElectroChem*, 2020, **7**, 4101-4107.
3. Z. Song, Y. Qian, X. Liu, T. Zhang, Y. Zhu, H. Yu, M. Otani and H. Zhou, *Energy Environ. Sci.*, 2014, **7**, 4077-4086.
4. Y. Jing, Y. Liang, S. Gheyhani and Y. Yao, *Nano Energy*, 2017, **37**, 46-52.
5. W. Huang, T. Jia, G. Zhou, S. Chen, Q. Hou, Y. Wang, S. Luo, G. Shi and B. Xu, *Electrochim. Acta*, 2018, **283**, 1284-1290.
6. Z. Song, H. Zhan and Y. Zhou, *Chem. Commun.*, 2009, **4**, 448-450.

7. K. Li, Q. Li, Y. Wang, H.-g. Wang, Y. Li and Z. Si, *Mater. Chem. Front.*, 2020, **4**, 2697-2703.
8. W. Xu, A. Read, P. K. Koech, D. Hu, C. Wang, J. Xiao, A. B. Padmaperuma, G. L. Graff, J. Liu and J.-G. Zhang, *J. Mater. Chem. A*, 2012, **22**, 4032-4039.
9. W. Liu, W. Tang, X.-P. Zhang, Y. Hu, X. Wang, Y. Yan, L. Xu and C. Fan, *Int. J. Hydrog. Energy*, 2021, **08**, 203.
10. H. P. Wu, Q. Yang, Q. H. Meng, A. Ahmad, M. Zhang, L. Y. Zhu, Y. G. Liu and Z. X. Wei, *J. Mater. Chem. A*, 2016, **4**, 2115-2121.
11. L.-W. Luo, C. Zhang, P. Xiong, Y. Zhao, W. Ma, Y. Chen, J. H. Zeng, Y. Xu and J.-X. Jiang, *Sci China Chem.*, 2021, **64**, 72-81.
12. T. Ma, Q. Zhao, J. Wang, Z. Pan and J. Chen, *Angew. Chem. Int. Ed.*, 2016, **55**, 6428-6432.
13. H. Lyu, P. Li, J. Liu, S. Mahurin, J. Chen, D. K. Hensley, G. M. Veith, Z. Guo, S. Dai and X.-G. Sun, *ChemSusChem*, 2018, **11**, 763-772.
14. J. Yang, H. Su, Z. Wang, P. Sun and Y. Xu, *ChemSusChem*, 2020, **13**, 2436-2442.
15. Z. Ba, Z. Wang, M. Luo, H.-b. Li, Y. Li, T. Huang, J. Dong, Q. Zhang and X. Zhao, *ACS Appl. Mater. Interfaces*, 2020, **12**, 807-817.
16. K. Li, Y. Wang, B. Gao, X. Lv, Z. Si and H.-g. Wang, *J. Colloid Interface Sci.*, 2021, **601**, 446-453.
17. Q. Li, D. Li, H. Wang, H.-g. Wang, Y. Li, Z. Si and Q. Duan, *ACS Appl. Mater. Interfaces*, 2019, **11**, 28801-28808.
18. X. Liu, S. Qiu, P. Mei, Q. Zhang and Y. Yang, *J. Mater. Sci.*, 2021, **56**, 3900-3910.

19. W. Mao, Y. Ding, M. Li, C. Ma, Z. Cao, C. He, K. Bao and Y. Qian, *ChemElectroChem*, 2021, **8**, 1678-1684.
20. H. Gao, B. Tian, H. Yang, A. R. Neale, M. A. Little, R. S. Sprick, L. J. Hardwick and A. I. Cooper, *ChemSusChem*, 2020, **13**, 5571-5579.
21. Y. Lu, X. Hou, L. Miao, L. Li, R. Shi, L. Liu and J. Chen, *Angew. Chem. Int. Ed.*, 2019, **58**, 7020-7024.
22. K. Amin, J. Zhang, H.-Y. Zhou, R. Lu, M. Zhang, N. Ashraf, C. YueLi, L. Mao, C. F. J. Faul and Z. Wei, *Sustain. Energy Fuels*, 2020, **4**, 4179-4185.
23. H. Peng, S. Wang, M. Kim, J. Kim, Y. Yamauchi, J. Yu and D. Li, *Energy Stor. Mater.*, 2020, **25**, 313-323.
24. A. Molina, N. Patil, E. Ventosa, M. Liras, J. Palma and R. Marcilla, *ACS Energy Lett.*, 2020, **5**, 2945-2953.
25. X. Wang, W. Tang, Y. Hu, W. Liu, Y. Yan, L. Xu and C. Fan, *Green Chem.*, 2021, **23**, 6090-6100.
26. H. Gao, Q. Zhu, A. R. Neale, M. Bahri, X. Wang, H. Yang, L. Liu, R. Clowes, N. D. Browning and R. S. Sprick, *Adv. Energy Mater.*, 2021, **11**, 2101880.
27. C. Cui, X. Ji, P.-F. Wang, G.-L. Xu, L. Chen, J. Chen, H. Kim, Y. Ren, F. Chen and C. Yang, *ACS Energy Lett.*, 2019, **5**, 224-231.
28. M. Ruby Raj, R. V. Mangalaraja, G. Lee, D. Contreras, K. Zaghib and M. Reddy, *ACS Appl. Energy Mater.*, 2020, **3**, 6511-6524.
29. C. Li, X. Liu, Z. He, W. Tao, Y. Zhang, Y. Zhang, Y. Jia, H. Yu, Q. Zeng and D. Wang, *J. Power Sources*, 2021, **511**, 230464.

30. A. Molina, N. Patil, E. Ventosa, M. Liras, J. Palma and R. Marcilla, *Adv. Funct. Mater.*, 2020, **30**, 1908074.
31. A. V. Mumyatov, A. F. Shestakov, N. N. Dremova, K. J. Stevenson and P. A. Troshin, *Energy Technol.*, 2019, **7**, 1801016.
32. T. Zhu, D. Liu, L. Shi, S. Lu, Y. Gao, D. Zhang, H. Mao, Z. Sun, C.-Y. Lao and M. Li, *ACS Appl. Mater. Interfaces*, 2020, **12**, 34910-34918.
33. J. Yang, Y. Shi, P. Sun, P. Xiong and Y. Xu, *ACS Appl. Mater. Interfaces*, 2019, **11**, 42305-42312.
34. G. Ding, L. Zhu, Q. Han, L. Xie, X. Yang, L. Chen, G. Wang and X. Cao, *Electrochim. Acta*, 2021, **394**, 139116.
35. I. Gomez, O. Leonet, J. Alberto Blazquez, H.-J. r. Grande and D. Mecerreyes, *ACS Macro Lett.*, 2018, **7**, 419-424.
36. K. T. Sarang, A. Miranda, H. An, E.-S. Oh, R. Verduzco and J. L. Lutkenhaus, *ACS Appl. Polym. Mater.*, 2019, **1**, 1155-1164.
37. D. Tang, W. Zhang, Z.-A. Qiao, Y. Liu and D. Wang, *Mater. Lett.*, 2018, **214**, 107-110.
38. B. Flamme, B. Jismy, M. Abarbri and M. Anouti, *Mater. Adv.*, 2021, **2**, 376-383.
39. J. Yang, Z. Wang, Y. Shi, P. Sun and Y. Xu, *ACS Appl. Mater. Interfaces*, 2020, **12**, 7179-7185.
40. Z. Ouyang, D. Tranca, Y. Zhao, Z. Chen, X. Fu, J. Zhu, G. Zhai, C. Ke, E. Kymakis and X. Zhuang, *ACS Appl. Mater. Interfaces*, 2021, **13**, 9064-9073.
41. J. Yang, P. Xiong, Y. Shi, P. Sun, Z. Wang, Z. Chen and Y. Xu, *Adv. Funct. Mater.*, 2020, **30**, 1909597.

42. L. Zhao, Z. Guan, Z. Ullah, C. Yu, H. Song, R. Chu, Y. Zhang, W. Li, Q. Li and L. Liu, *Electrochim. Acta*, 2020, **335**, 135681.
43. S. Zheng, L. Miao, T. Sun, L. Li, T. Ma, J. Bao, Z. Tao and J. Chen, *J. Mater. Chem. A*, 2021, **9**, 2700-2705.
44. A. Petronico, K. L. Bassett, B. G. Nicolau, A. A. Gewirth and R. G. Nuzzo, *Adv. Energy Mater.*, 2018, **8**, 1700960.
45. G. Wang, N. Chandrasekhar, B. P. Biswal, D. Becker, S. Paasch, E. Brunner, M. Addicoat, M. Yu, R. Berger and X. Feng, *Adv. Mater.*, 2019, **31**, 1901478.
46. C.-J. Yao, Z. Wu, J. Xie, F. Yu, W. Guo, Z. J. Xu, D.-S. Li, S. Zhang and Q. Zhang, *ChemSusChem*, 2020, **13**, 2457-2463.
47. Q. Li, H. Wang, H. g. Wang, Z. Si, C. Li and J. Bai, *ChemSusChem*, 2020, **13**, 2449-2456.
48. X. Yang, Y. Hu, N. Dunlap, X. Wang, S. Huang, Z. Su, S. Sharma, Y. Jin, F. Huang and X. Wang, *Angew. Chem. Int. Ed.*, 2020, **59**, 20385-20389.
49. Z. Luo, L. Liu, J. Ning, K. Lei, Y. Lu, F. Li and J. Chen, *Angew. Chem. Int. Ed.*, 2018, **57**, 9443-9446.
50. Y. Hu, Y. Gao, L. Fan, Y. Zhang, B. Wang, Z. Qin, J. Zhou and B. Lu, *Adv. Energy Mater.*, 2020, **10**, 2002780.
51. E. Vitaku, C. N. Gannett, K. L. Carpenter, L. Shen, H. D. Abruña and W. R. Dichtel, *J. Am. Chem. Soc.*, 2019, **142**, 16-20.
52. Z. Wang, Y. Li, P. Liu, Q. Qi, F. Zhang, G. Lu, X. Zhao and X. Huang, *Nanoscale*, 2019, **11**, 5330-5335.
53. Q. Zhang, Y. He, G. Lin, X. Ma, Z. Xiao, D. Shi and Y. Yang, *J. Mater. Chem. A*, 2021, **9**,



10652-10660.

54. J. Xie, W. Chen, G. Long, W. Gao, Z. J. Xu, M. Liu and Q. Zhang, *J. Mater. Chem. A*, 2018, **6**, 12985-12991.

55. Y. Jing, Y. Liang, S. Gheytani and Y. Yao, *ChemSusChem*, 2020, **13**, 2250-2255.
